# Supplementary material for: Household Global Positioning System (GPS) coordinates duplication in health surveys – a case study of the Vaccination Coverage Surveys in the Democratic Republic of Congo (DRC)
Source: Research Square preprint supplement (doi:10.21203/rs.3.rs-7221573/v1), 2025-08-07
Supplement: Supplementary file 1 [file 06265c984901f625939884f9.docx]

***Supplementary Material I***

**Skip-pattern questions inspected in this analysis**

| QA706 | QA706. Have you ever missed a vaccination appointment for your child from March to today? | | 1 | Yes | | --- | --- | | 2 | No (skip next) | |
| --- | --- | --- | --- | --- | --- | --- |
| QA220 | QA220 Does your household own any livestock? | | 1 | Yes | | --- | --- | | 2 | No (skip next) | |
| VS25B | VS25b Is [vs17] covered by health insurance? | | 1 | Yes | | --- | --- | | 2 | No (skip next) | |
| VS25D | VS25d Does [vs17] have a birth certificate? (FOSA) | |  | 1 | Yes, seen | | --- | --- | --- | |  | 2 | Yes, not seen (skip next) | |  | 3 | No (skip next) | |  | 8 | Don't know (skip next) | |
| VS85A | VS85a. How do you rate the quality of vaccination services provided at the health center you usually attend? | |  | 1 | Good (skip next) | | --- | --- | --- | |  | 2 | Bad | |  | 99 | NSP (skip next) | |
| VS136 | VS136. In the past year , have any household members lived or worked elsewhere for part of the year ? (Slept elsewhere for more than a month) | | 1 | Yes | | --- | --- | | 2 | No (skip next) | | 99 | NSP (skip next) | |
| QA701 | QA701. Have you used the vaccination service for a child since March 2020 until today? | |  | 1 | Yes | | --- | --- | --- | |  | 2 | No (skip next) | |
| Q618 | Q618. Do you know of any child in your family or community who has had health problems following vaccination in the past 12 months? | |  | 1 | No (skip next) | | --- | --- | --- | |  | 2 | Uncertain (skip next) | |  | 3 | Yes | |
| QA218 | QA218. Does your household own land? | | 1 | Yes | | --- | --- | | 2 | No (skip next) | |

**Questions inspected for straight-line response**

| **QA501 Series** Do you know which childhood diseases can be prevented by vaccination? If so, list them.  *Investigator, do not suggest answers.* | |
| --- | --- |
| Tuberculosis | |  | 1 | Yes | | --- | --- | --- | |  | 2 | No | |
| Diphtheria | |  | 1 | Yes | | --- | --- | --- | |  | 2 | No | |
| Whooping cough | |  | 1 | Yes | | --- | --- | --- | |  | 2 | No | |
| Hepatitis | |  | 1 | Yes | | --- | --- | --- | |  | 2 | No | |
| Hemophilis influence | |  | 1 | Yes | | --- | --- | --- | |  | 2 | No | |
| Poliomyelitis | |  | 1 | Yes | | --- | --- | --- | |  | 2 | No | |
| Measles | |  | 1 | Yes | | --- | --- | --- | |  | 2 | No | |
| Yellow fever | |  | 1 | Yes | | --- | --- | --- | |  | 2 | No | |
| Tetanus | |  | 1 | Yes | | --- | --- | --- | |  | 2 | No | |
| Pneumonia | |  | 1 | Yes | | --- | --- | --- | |  | 2 | No | |
| Meningitis | |  | 1 | Yes | | --- | --- | --- | |  | 2 | No | |
| Diarrhea | |  | 1 | Yes | | --- | --- | --- | |  | 2 | No | |
| NSP | |  | 1 | Yes | | --- | --- | --- | |  | 2 | No | |
| Other | |  | 1 | Yes | | --- | --- | --- | |  | 2 | No | |

| **QA502 Series** Who do you think are the best people to talk to you about vaccination? |  |
| --- | --- |
| Health personnel | |  | 1 | Yes | | --- | --- | --- | |  | 2 | No | |
| Parents | |  | 1 | Yes | | --- | --- | --- | |  | 2 | No | |
| Grandparents | |  | 1 | Yes | | --- | --- | --- | |  | 2 | No | |
| Other parents | |  | 1 | Yes | | --- | --- | --- | |  | 2 | No | |
| Friends/colleagues/neighbors | |  | 1 | Yes | | --- | --- | --- | |  | 2 | No | |
| Social mobilizers/community relays | |  | 1 | Yes | | --- | --- | --- | |  | 2 | No | |
| District/village/customary chief | |  | 1 | Yes | | --- | --- | --- | |  | 2 | No | |
| Journalist | |  | 1 | Yes | | --- | --- | --- | |  | 2 | No | |
| Opinion leader | |  | 1 | Yes | | --- | --- | --- | |  | 2 | No | |
| Theater actor | |  | 1 | Yes | | --- | --- | --- | |  | 2 | No | |
| Pastor/priest/imam | |  | 1 | Yes | | --- | --- | --- | |  | 2 | No | |
| Traditional practitioner | |  | 1 | Yes | | --- | --- | --- | |  | 2 | No | |
| Other (please specify) | |  | 1 | Yes | | --- | --- | --- | |  | 2 | No | |
| NSP | |  | 1 | Yes | | --- | --- | --- | |  | 2 | No | |

| **QA503 Series** What information channels would you prefer to use to learn about routine vaccination? | |
| --- | --- |
| TV | |  | 1 | Yes | | --- | --- | --- | |  | 2 | No | |
| Radio | |  | 1 | Yes | | --- | --- | --- | |  | 2 | No | |
| Associations/meetings | |  | 1 | Yes | | --- | --- | --- | |  | 2 | No | |
| Social mobilizers/community relays | |  | 1 | Yes | | --- | --- | --- | |  | 2 | No | |
| Posters/banners | |  | 1 | Yes | | --- | --- | --- | |  | 2 | No | |
| Newspapers | |  | 1 | Yes | | --- | --- | --- | |  | 2 | No | |
| Church/mosque | |  | 1 | Yes | | --- | --- | --- | |  | 2 | No | |
| Health personnel | |  | 1 | Yes | | --- | --- | --- | |  | 2 | No | |
| Friends/colleagues neighbors | |  | 1 | Yes | | --- | --- | --- | |  | 2 | No | |
| Sound-equipped vehicles | |  | 1 | Yes | | --- | --- | --- | |  | 2 | No | |
| SMS | |  | 1 | Yes | | --- | --- | --- | |  | 2 | No | |
| Internet | |  | 1 | Yes | | --- | --- | --- | |  | 2 | No | |
| Billboards | |  | 1 | Yes | | --- | --- | --- | |  | 2 | No | |
| Other (please specify) | |  | 1 | Yes | | --- | --- | --- | |  | 2 | No | |

| **QA6 Series** PERCEPTION OF MOTHERS/GUARDIANS OF CHILDREN AGED 6-23 MONTHS ON VACCINATION | | | |
| --- | --- | --- | --- |
| QA601 How good do you think vaccines are for your child? | | | |  | 1 | Very good | | --- | --- | --- | |  | 2 | Good | |  | 3 | Bad | |  | 4 | Very bad | |  | 5 | Don't know | |
| QA602 How safe do you think vaccines are for your child? | | | |  | 1 | Very safe | | --- | --- | --- | |  | 2 | On | |  | 3 | Unsafe | |  | 4 | Not at all sure | |  | 5 | Don't know | |
| QA603. To what extent do you think vaccines protect your child against diseases? | | | |  | 1 | Very strongly | | --- | --- | --- | |  | 2 | Strongly | |  | 3 | Weakly | |  | 4 | Very weakly | |  | 5 | Don't know | |
| QA604. How confident are you in your ability to take your child for scheduled vaccination visits? | | | |  | 1 | Very capable | | --- | --- | --- | |  | 2 | Able | |  | 3 | Little capable | |  | 4 | Not at all capable | |  | 5 | Don't know | |
| QA605. To what extent would you encourage others to have their children vaccinated? | | | |  | 1 | Very strongly | | --- | --- | --- | |  | 2 | Strongly | |  | 3 | Weakly | |  | 4 | Very weakly | |  | 5 | Don't know | |
| QA606. How much do people in your community appreciate childhood vaccination services? | | | |  | 1 | Very strongly | | --- | --- | --- | |  | 2 | Strongly | |  | 3 | Weakly | |  | 4 | Very weakly | |  | 5 | Don't know | |
| QA607. To what extent does your spouse or partner/child's father or guardian approve of children's vaccinations? | | | |  | 1 | Very strongly | | --- | --- | --- | |  | 2 | Strongly | |  | 3 | Weakly | |  | 4 | Very weakly | |  | 5 | Don't know | |
| QA608. To what extent do other parents in your community approve of childhood vaccinations? | | | |  | 1 | Very strongly | | --- | --- | --- | |  | 2 | Strongly | |  | 3 | Weakly | |  | 4 | Very weakly | |  | 5 | Don't know | |
| QA609. To what extent do leaders in your community approve of childhood vaccinations? | | | |  | 1 | Very strongly | | --- | --- | --- | |  | 2 | Strongly | |  | 3 | Weakly | |  | 4 | Very weakly | |  | 5 | Don't know | |
| QA610. To what extent does your religion influence the decision to vaccinate your child? | | | |  | 1 | Very strongly | | --- | --- | --- | |  | 2 | Strongly | |  | 3 | Weakly | |  | 4 | Very weakly | |  | 5 | Don't know | |
| QA611. To what extent would you say that childhood vaccinations are consistent with your religious beliefs? | | | |  | 1 | Very strongly | | --- | --- | --- | |  | 2 | Strongly | |  | 3 | Weakly | |  | 4 | Very weakly | |  | 5 | Don't know | |
| QA612. To what extent do you think measles poses a threat to the health of children who are not vaccinated? | | | |  | 1 | Very strongly | | --- | --- | --- | |  | 2 | Strongly | |  | 3 | Weakly | |  | 4 | Very weakly | |  | 5 | Don't know | |
| **VS1 Series** What have you heard about vaccination?  *Interviewer : Check if the answers that the mother or guardian gives you are among the answers on this page and check "mentioned" for all her answers and "not mentioned" for the rest of the answers.* | | |
| VS127. campaigns (e.g. dates, target age group ): | |  | 1 | Mentioned | | --- | --- | --- | |  | 2 | Not mentioned | | |
| VS128. Importance of routine vaccination | |  | 1 | Mentioned | | --- | --- | --- | |  | 2 | Not mentioned | | |
| VS129. Where to get vaccinated | |  | 1 | Mentioned | | --- | --- | --- | |  | 2 | Not mentioned | | |
| VS130. Age for routine vaccinations | |  | 1 | Mentioned | | --- | --- | --- | |  | 2 | Not mentioned | | |
| VS131. Return for subsequent doses of routine vaccines | |  | 1 | Mentioned | | --- | --- | --- | |  | 2 | Not mentioned | | |
| VS132. New vaccines (pneumococcal and rotavirus) | |  | 1 | Mentioned | | --- | --- | --- | |  | 2 | Not mentioned | | |
| VS133. Other ( specify below) | |  | 1 | Mentioned | | --- | --- | --- | |  | 2 | Not mentioned | | |
| VS134. Don't know | |  | 1 | Mentioned | | --- | --- | --- | |  | 2 | Not mentioned | | |

| ***Supplementary Material II***  Example of providing the same response to all sub-question in this series:   | **Question: What have you heard about vaccination?** | | **Select one** | | --- | --- | --- | | VS127. | Campaigns | ◉ Mentioned  ○ Not mentioned | | VS128. | Importance of routine vaccination | ◉ Mentioned  ○ Not mentioned | | VS129. | Where to get vaccinated | ◉ Mentioned  ○ Not mentioned | | VS130. | Age for routine vaccinations | ◉ Mentioned  ○ Not mentioned | | VS131. | Return for subsequent doses of routine vaccines | ◉ Mentioned  ○ Not mentioned | | VS132. | New vaccines | ◉ Mentioned  ○ Not mentioned |   Example of not providing the same response to all sub-question in this series:   | **Question: What have you heard about vaccination?** | | **Select one** | | --- | --- | --- | | VS127. | Campaigns | ○ Mentioned  ◉ Not mentioned | | VS128. | Importance of routine vaccination | ○ Mentioned  ◉ Not mentioned | | VS129. | Where to get vaccinated | ◉ Mentioned  ○ Not mentioned | | VS130. | Age for routine vaccinations | ◉ Mentioned  ○ Not mentioned | | VS131. | Return for subsequent doses of routine vaccines | ◉ Mentioned  ○ Not mentioned | | VS132. | New vaccines | ◉ Mentioned  ○ Not mentioned | |
| --- | --- | --- | --- | --- | --- | --- | --- | --- | --- | --- | --- | --- | --- | --- | --- | --- | --- | --- | --- | --- | --- | --- | --- | --- | --- | --- | --- | --- | --- | --- | --- | --- | --- | --- | --- | --- | --- | --- | --- | --- | --- | --- |
